# Supplementary material for: Network Pharmacology and Pharmacological Evaluation Reveals the Mechanism of the Sanguisorba Officinalis in Suppressing Hepatocellular Carcinoma
Source: PubMed Central journal article supplement (PMC7969657; doi:10.3389/fphar.2021.618522), 2021-03-04
Supplement: datasheet1.pdf [file datasheet1.pdf]

# beta-actin

SO( $\mu\text{g/ml}$ ) 0 62.5 125 250

0 62.5 125 250

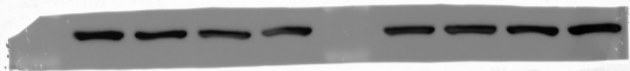

# AKT

SO( $\mu\text{g/ml}$ ) 0 62.5 125 250

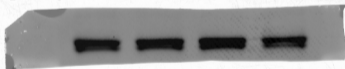

# EGFR

SO( $\mu\text{g/ml}$ )

0 62.5 125 250

SO( $\mu\text{g/ml}$ )

0 62.5 125 250

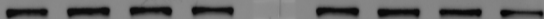

SO( $\mu\text{g/ml}$ ) 0 62.5 125 250

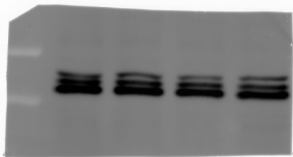

**MAPK**

# NFkB

SO( $\mu\text{g/ml}$ ) 0 62.5 125 250

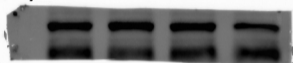

# p-akt

SO( $\mu\text{g/ml}$ ) 0 62.5 125 250

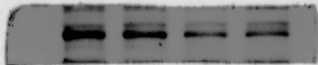

SO( $\mu\text{g/ml}$ )

0 62.5 125 250

0 62.5 125 250

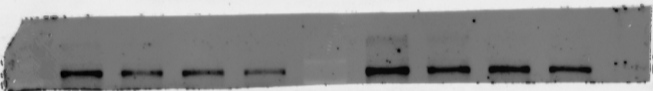

p-PI3K

# PI3K

SO( $\mu\text{g/ml}$ )

0 62.5 125 250

SO( $\mu\text{g/ml}$ )

0 62.5 125 250

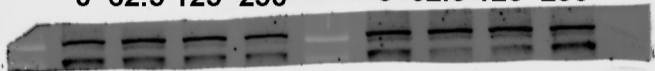



SO( $\mu\text{g/ml}$ ) 0 62.5 125 250

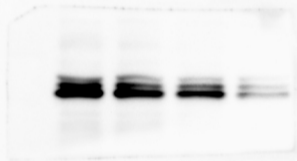

**p-MAPK**

# p-NFkB

SO( $\mu\text{g/ml}$ ) 0 62.5 125 250

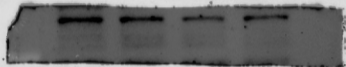

SO( $\mu\text{g/ml}$ ) 0 62.5 125 250

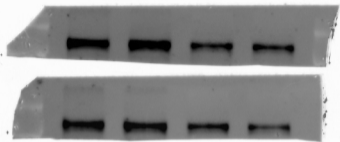

**p-PI3K**
